# Supplementary material
Source: PubMed Central journal article supplement (PMC3831885)

## **SUPPLEMENTARY TABLES**

**Supplementary Table 1A.** Genetic markers for CSS intercrosses, including genotype frequencies and physical location of each marker. For SNPs, rs#'s are provided if available. For MIT markers, the MIT# is provided, and the location of the start of the marker is provided. The P values derived from  $\chi^2$  square tests are also listed. All locations are from the 'build 37' of the mouse genome.

| Chr1 | rs# or MIT# (if available) | Location in bp (2007) | NA | BB | BA | AA | P value |
|------|----------------------------|-----------------------|----|----|----|----|---------|
| m1   | <i>rs6279250</i>           | 34861334              | 9  | 16 | 44 | 23 | 0.48    |
| m2   | <i>rs3698978</i>           | 50280311              | 7  | 21 | 41 | 23 | 0.90    |
| m3   | NA                         | 69358085              | 7  | 18 | 39 | 28 | 0.23    |
| m4   | NA                         | 93051201              | 13 | 25 | 28 | 26 | 0.035   |
| m5   | NA                         | 115866540             | 2  | 24 | 39 | 27 | 0.41    |
| m6   | NA                         | 137009748             | 4  | 23 | 48 | 17 | 0.46    |
| m7   | NA                         | 161819366             | 13 | 25 | 35 | 19 | 0.38    |
| m8   | NA                         | 179077988             | 1  | 26 | 50 | 15 | 0.17    |

| Chr2 | rs# or MIT# (if available) | Location in bp (2007) | NA | BB | BA | AA | P value |
|------|----------------------------|-----------------------|----|----|----|----|---------|
| m1   | <i>rs6268728</i>           | 3098242               | 6  | 20 | 44 | 19 | 0.85    |
| m2   | <i>rs6186663</i>           | 19707302              | 4  | 22 | 44 | 19 | 0.85    |
| m3   | <i>rs3709811</i>           | 37512633              | 8  | 19 | 44 | 18 | 0.73    |
| m4   | <i>rs3683801</i>           | 50982703              | 9  | 20 | 40 | 20 | 1.0     |
| m5   | <i>rs3725789</i>           | 68943607              | 8  | 21 | 40 | 20 | 0.98    |
| m6   | <i>rs6195857</i>           | 94463620              | 17 | 20 | 30 | 22 | 0.35    |
| m8   | NA                         | 123084010             | 0  | 22 | 47 | 20 | 0.83    |
| m9   | <i>rs3659784</i>           | 127811381             | 0  | 22 | 46 | 21 | 0.94    |
| m10  | NA                         | 143750271             | 0  | 25 | 46 | 18 | 0.55    |
| m11  | <i>rs6165476</i>           | 153378234             | 7  | 24 | 42 | 16 | 0.45    |
| m12  | <i>rs6280640</i>           | 169140117             | 10 | 24 | 42 | 13 | 0.18    |
| m13  | <i>rs3664044</i>           | 173433324             | 3  | 29 | 39 | 18 | 0.17    |

| Chr3 | rs# or MIT# (if available) | Location in bp (2007) | NA | BB | BA | AA | P value |
|------|----------------------------|-----------------------|----|----|----|----|---------|
| m1   | <i>rs3654259</i>           | 8191414               | 6  | 28 | 44 | 12 | 0.043   |
| m2   | <i>rs6345660</i>           | 17057227              | 10 | 24 | 45 | 11 | 0.065   |
| m3   | <i>rs3704796</i>           | 37877811              | 6  | 29 | 45 | 10 | 0.011   |
| m4   | <i>rs3722463</i>           | 43958542              | 7  | 30 | 41 | 12 | 0.020   |
| m5   | <i>rs3691410</i>           | 52701909              | 6  | 27 | 44 | 13 | 0.088   |
| m6   | <i>rs6408988</i>           | 65496801              | 6  | 27 | 42 | 15 | 0.18    |
| m7   | NA                         | 76369126              | 9  | 27 | 39 | 15 | 0.16    |
| m8   | NA                         | 87319781              | 11 | 25 | 39 | 15 | 0.28    |
| m9   | <i>rs3725719</i>           | 98835339              | 6  | 28 | 41 | 15 | 0.13    |
| m10  | <i>rs6223512</i>           | 115460765             | 6  | 26 | 40 | 18 | 0.42    |
| m11  | NA                         | 127224122             | 8  | 26 | 35 | 21 | 0.31    |
| m12  | NA                         | 139075990             | 9  | 24 | 36 | 21 | 0.54    |
| m13  | <i>rs3667861</i>           | 150149500             | 6  | 23 | 39 | 22 | 0.80    |
| m14  | <i>rs3705364</i>           | 153989782             | 6  | 23 | 38 | 23 | 0.68    |

| Chr4 | rs# or MIT# (if available) | Location in bp (2007) | NA | BB | BA | AA | P value |
|------|----------------------------|-----------------------|----|----|----|----|---------|
| m1   | <i>rs3673940</i>           | 10707784              | 1  | 22 | 47 | 21 | 0.90    |
| m2   | <i>rs3668108</i>           | 20937009              | 3  | 19 | 51 | 18 | 0.32    |
| m3   | <i>rs6180709</i>           | 34233990              | 2  | 23 | 44 | 22 | 0.98    |
| m4   | <i>rs6292901</i>           | 45719484              | 3  | 24 | 43 | 21 | 0.88    |
| m5   | <i>rs3718270</i>           | 62737984              | 1  | 22 | 50 | 18 | 0.48    |
| m7   | <i>rs6346428</i>           | 91018031              | 1  | 22 | 47 | 21 | 0.90    |
| m8   | <i>rs3702483</i>           | 100341635             | 4  | 19 | 46 | 22 | 0.78    |
| m9   | <i>rs3669776</i>           | 114062188             | 1  | 26 | 46 | 18 | 0.48    |
| m11  | <i>rs3660565</i>           | 154234901             | 2  | 28 | 44 | 17 | 0.26    |
| m12  | <i>rs6356815</i>           | 154901839             | 4  | 28 | 41 | 18 | 0.27    |

| Chr5 | rs# or MIT# (if available) | Location in bp (2007) | NA | BB | BA | AA | P value |
|------|----------------------------|-----------------------|----|----|----|----|---------|
| m2   | NA                         | 3954562               | 4  | 15 | 42 | 31 | 0.050   |
| m1   | rs3720435                  | 6707774               | 6  | 16 | 42 | 28 | 0.18    |
| m3   | NA                         | 28799894              | 3  | 20 | 40 | 29 | 0.26    |
| m4   | rs3697876                  | 44762021              | 3  | 17 | 50 | 22 | 0.38    |
| m5   | NA                         | 54280548              | 4  | 17 | 49 | 22 | 0.43    |
| m6   | NA                         | 66895169              | 3  | 17 | 52 | 20 | 0.26    |
| m7   | rs6370445                  | 77445413              | 5  | 19 | 49 | 19 | 0.50    |
| m8   | NA                         | 77874807              | 6  | 20 | 48 | 18 | 0.53    |
| m9   | NA                         | 100487351             | 3  | 24 | 50 | 15 | 0.20    |
| m10  | rs4139216                  | 106277814             | 4  | 23 | 50 | 15 | 0.21    |
| m11  | rs3710475                  | 124419573             | 3  | 27 | 47 | 15 | 0.17    |
| m12  | rs3679356                  | 130062448             | 6  | 27 | 47 | 12 | 0.050   |
| m13  | rs3683595                  | 148381541             | 11 | 18 | 42 | 21 | 0.85    |
| m14  | rs13494898                 | 150723203             | 6  | 24 | 44 | 18 | 0.64    |

| Chr6 | rs# or MIT# (if available) | Location in bp (2007) | NA | BB | BA | AA | P value |
|------|----------------------------|-----------------------|----|----|----|----|---------|
| m1   | rs6399637                  | 4038999               | 2  | 23 | 47 | 21 | 0.91    |
| m2   | D6Mit138                   | 4453823               | 1  | 23 | 47 | 22 | 0.97    |
| m3   | rs6206704                  | 24099478              | 2  | 21 | 49 | 21 | 0.76    |
| m4   | D6Mit159                   | 29701222              | 1  | 21 | 50 | 21 | 0.71    |
| m5   | rs3653923                  | 36326302              | 3  | 22 | 48 | 20 | 0.78    |
| m6   | rs6238771                  | 45196664              | 3  | 20 | 50 | 20 | 0.57    |
| m8   | rs3687557                  | 47171501              | 3  | 20 | 49 | 21 | 0.69    |
| m9   | D6Mit274                   | 48676564              | 1  | 22 | 50 | 20 | 0.68    |
| m10  | rs3704207                  | 51788954              | 3  | 21 | 47 | 22 | 0.90    |
| m11  | rs6272774                  | 54130746              | 3  | 20 | 49 | 21 | 0.69    |
| m12  | rs6357773                  | 54486887              | 3  | 20 | 48 | 22 | 0.78    |
| m13  | D6Mit384                   | 55149860              | 1  | 20 | 50 | 22 | 0.68    |
| m14  | rs3719871                  | 73275180              | 5  | 18 | 53 | 17 | 0.16    |
| m15  | D6Mit188                   | 75397577              | 1  | 18 | 56 | 18 | 0.11    |
| m16  | D6Mit391                   | 85227313              | 1  | 19 | 52 | 21 | 0.44    |
| m17  | rs3678992                  | 86744027              | 1  | 20 | 51 | 21 | 0.57    |
| m18  | D6Mit284                   | 92557300              | 1  | 20 | 51 | 21 | 0.57    |
| m19  | D6Mit36                    | 104453354             | 1  | 19 | 47 | 26 | 0.57    |
| m20  | rs3660181                  | 106576613             | 2  | 19 | 46 | 26 | 0.58    |
| m21  | D6Mit287                   | 111954645             | 1  | 18 | 49 | 25 | 0.48    |
| m22  | D6Mit254                   | 125306664             | 1  | 17 | 51 | 24 | 0.34    |
| m23  | rs3673273                  | 127706085             | 3  | 15 | 51 | 24 | 0.18    |
| m24  | rs3725987                  | 137509363             | 2  | 16 | 48 | 27 | 0.23    |
| m26  | D6Mit159                   | 146377508             | 1  | 17 | 42 | 33 | 0.044   |
| m27  | rs3726118                  | 146616586             | 1  | 20 | 39 | 33 | 0.055   |
| m28  | rs3655959                  | 147672117             | 2  | 18 | 41 | 32 | 0.074   |

| Chr7 | rs# or MIT# (if available) | Location in bp (2007) | NA | BB | BA | AA | P value |
|------|----------------------------|-----------------------|----|----|----|----|---------|
| m1   | NA                         | 10759214              | 1  | 21 | 40 | 26 | 0.57    |
| m2   | rs6253542                  | 18294434              | 0  | 22 | 41 | 25 | 0.74    |
| m3   | D7Mit117                   | 30711325              | 0  | 21 | 45 | 22 | 0.97    |
| m4   | rs6317174                  | 31199827              | 2  | 21 | 44 | 21 | 0.98    |
| m5   | rs6295036                  | 53518750              | 0  | 23 | 45 | 20 | 0.88    |
| m6   | D7Mit145                   | 58658647              | 0  | 24 | 42 | 22 | 0.87    |
| m7   | rs6358650                  | 71779376              | 2  | 24 | 41 | 21 | 0.82    |
| m8   | rs6238048                  | 78800660              | 7  | 25 | 37 | 19 | 0.47    |
| m9   | D7Mit318                   | 81093848              | 0  | 26 | 42 | 20 | 0.61    |
| m10  | rs3685723                  | 87429996              | 2  | 24 | 43 | 19 | 0.75    |
| m11  | rs6180537                  | 94396119              | 1  | 28 | 39 | 20 | 0.30    |
| m12  | D7Mit301                   | 98732421              | 2  | 28 | 41 | 17 | 0.22    |
| m13  | rs6207175                  | 101211976             | 0  | 27 | 42 | 19 | 0.44    |
| m14  | rs3707827                  | 108612007             | 0  | 26 | 44 | 18 | 0.48    |
| m15  | D7Mit238                   | 126237672             | 0  | 26 | 43 | 19 | 0.56    |
| m16  | D7Mit255                   | 132057953             | 2  | 25 | 42 | 19 | 0.64    |
| m17  | rs3669956                  | 141707427             | 2  | 23 | 39 | 24 | 0.68    |
| m18  | rs3660122                  | 146762950             | 2  | 17 | 46 | 23 | 0.53    |

| Chr8 | rs# or MIT# (if available) | Location in bp (2007) | NA | BB | BA | AA | P value |
|------|----------------------------|-----------------------|----|----|----|----|---------|
| m1   | NA                         | 7701082               | 8  | 24 | 47 | 13 | 0.13    |
| m2   | rs3665611                  | 14696377              | 3  | 27 | 46 | 16 | 0.24    |
| m3   | rs3696130                  | 18414948              | 2  | 29 | 44 | 17 | 0.20    |
| m4   | rs3668791                  | 32235562              | 3  | 30 | 39 | 20 | 0.16    |
| m5   | NA                         | 44323159              | 3  | 30 | 39 | 20 | 0.16    |
| m6   | NA                         | 58256437              | 4  | 30 | 40 | 18 | 0.14    |
| m7   | NA                         | 70778784              | 4  | 32 | 38 | 18 | 0.048   |
| m8   | rs3704660                  | 71590932              | 6  | 31 | 38 | 17 | 0.057   |
| m9   | NA                         | 83394568              | 3  | 30 | 41 | 18 | 0.15    |
| m10  | rs6180306                  | 109166165             | 3  | 26 | 49 | 14 | 0.13    |

| Chr9 | rs# or MIT# (if available) | Location in bp (2007) | NA | BB | BA | AA | P value |
|------|----------------------------|-----------------------|----|----|----|----|---------|
| m1   | NA                         | 6238770               | 1  | 20 | 38 | 16 | 0.78    |
| m2   | rs3718348                  | 13273648              | 7  | 17 | 36 | 15 | 0.84    |
| m3   | rs13480100                 | 21254586              | 4  | 17 | 39 | 15 | 0.67    |
| m4   | rs13480121                 | 30569454              | 0  | 18 | 41 | 16 | 0.68    |
| m5   | NA                         | 42998616              | 6  | 16 | 38 | 15 | 0.69    |
| m6   | rs3674354                  | 45608804              | 6  | 14 | 41 | 14 | 0.29    |
| m7   | NA                         | 55648369              | 8  | 18 | 34 | 15 | 0.87    |
| m8   | NA                         | 67272481              | 3  | 20 | 36 | 16 | 0.80    |
| m9   | NA                         | 78782775              | 1  | 20 | 38 | 16 | 0.78    |
| m10  | NA                         | 91213376              | 18 | 16 | 25 | 16 | 0.65    |
| m12  | NA                         | 102819274             | 2  | 18 | 37 | 18 | 0.99    |
| m13  | NA                         | 112970216             | 4  | 20 | 30 | 21 | 0.42    |
| m14  | rs3689641                  | 117065881             | 5  | 17 | 33 | 20 | 0.78    |
| m15  | rs13480461                 | 123156563             | 1  | 19 | 35 | 20 | 0.89    |

| Chr10 | rs# or MIT# (if available) | Location in bp (2007) | NA | BB | BA | AA | P value |
|-------|----------------------------|-----------------------|----|----|----|----|---------|
| m1    | NA                         | 3052687               | 1  | 23 | 46 | 19 | 0.76    |
| m2    | NA                         | 15458832              | 0  | 26 | 44 | 19 | 0.57    |
| m3    | rs13480559                 | 27164666              | 0  | 26 | 41 | 22 | 0.63    |
| m4    | rs13480605                 | 45532637              | 0  | 26 | 42 | 21 | 0.66    |
| m5    | NA                         | 57864252              | 0  | 27 | 40 | 22 | 0.48    |
| m6    | NA                         | 67650755              | 0  | 23 | 44 | 22 | 0.98    |
| m7    | NA                         | 82456915              | 0  | 22 | 44 | 23 | 0.98    |
| m8    | NA                         | 93796983              | 0  | 22 | 43 | 24 | 0.91    |
| m9    | NA                         | 108194335             | 3  | 19 | 42 | 25 | 0.64    |
| m10   | NA                         | 113663225             | 2  | 20 | 41 | 26 | 0.57    |
| m11   | rs13480828                 | 128283020             | 2  | 30 | 49 | 8  | 0.0019  |
| m12   | rs13480829                 | 128787461             | 1  | 32 | 48 | 8  | 0.0010  |

| Chr11 | rs# or MIT# (if available) | Location in bp (2007) | NA | BB | BA | AA | P value |
|-------|----------------------------|-----------------------|----|----|----|----|---------|
| m1    | NA                         | 19462224              | 5  | 18 | 41 | 22 | 0.82    |
| m2    | NA                         | 36473611              | 3  | 20 | 40 | 23 | 0.85    |
| m3    | NA                         | 47824182              | 4  | 17 | 41 | 24 | 0.55    |
| m4    | NA                         | 60767164              | 4  | 21 | 39 | 22 | 0.90    |
| m5    | NA                         | 74388242              | 3  | 17 | 46 | 20 | 0.55    |
| m6    | NA                         | 87797367              | 4  | 17 | 48 | 17 | 0.30    |
| m7    | NA                         | 103185048             | 3  | 20 | 45 | 18 | 0.71    |
| m8    | NA                         | 118205023             | 1  | 21 | 44 | 20 | 0.94    |

| Chr12 | rs# or MIT# (if available) | Location in bp (2007) | NA | BB | BA | AA | P value |
|-------|----------------------------|-----------------------|----|----|----|----|---------|
| m1    | <i>rs6175716</i>           | 9520029               | 3  | 15 | 39 | 32 | 0.024   |
| m2    | <i>rs3708787</i>           | 25743947              | 4  | 17 | 34 | 34 | 0.0061  |
| m3    | <i>rs3655563</i>           | 29745274              | 2  | 21 | 32 | 34 | 0.0069  |
| m4    | <i>rs6244300</i>           | 34067654              | 4  | 21 | 31 | 33 | 0.0082  |
| m5    | <i>rs3714470</i>           | 44175578              | 2  | 24 | 34 | 29 | 0.094   |
| m6    | <i>rs3679289</i>           | 57962053              | 7  | 22 | 34 | 26 | 0.25    |
| m7    | NA                         | 67853389              | 2  | 18 | 40 | 29 | 0.19    |
| m8    | NA                         | 77892012              | 1  | 21 | 42 | 25 | 0.76    |
| m9    | NA                         | 89957360              | 0  | 22 | 42 | 25 | 0.79    |
| m10   | <i>rs6194601</i>           | 101176937             | 4  | 28 | 37 | 20 | 0.23    |
| m11   | <i>rs6244378</i>           | 108656482             | 3  | 30 | 40 | 16 | 0.083   |
| m12   | <i>rs3663714</i>           | 117496454             | 5  | 32 | 39 | 13 | 0.011   |

| Chr13 | rs# or MIT# (if available) | Location in bp (2007) | NA | BB | BA | AA | P value |
|-------|----------------------------|-----------------------|----|----|----|----|---------|
| m1    | NA                         | 17329088              | 5  | 23 | 32 | 20 | 0.40    |
| m2    | <i>rs3712759</i>           | 30912387              | 1  | 23 | 36 | 20 | 0.65    |
| m3    | NA                         | 31360028              | 0  | 23 | 36 | 21 | 0.64    |
| m4    | NA                         | 45626046              | 3  | 21 | 32 | 24 | 0.30    |
| m5    | <i>rs6292911</i>           | 46643637              | 2  | 20 | 35 | 23 | 0.59    |
| m6    | <i>rs13481839</i>          | 60519003              | 4  | 20 | 36 | 20 | 0.90    |
| m7    | <i>rs3701026</i>           | 69417270              | 1  | 20 | 38 | 21 | 0.93    |
| m8    | NA                         | 76738759              | 4  | 17 | 38 | 21 | 0.81    |
| m9    | NA                         | 90068112              | 2  | 15 | 43 | 20 | 0.48    |
| m10   | NA                         | 117503836             | 0  | 14 | 49 | 17 | 0.11    |
| m11   | <i>rs3664641</i>           | 119994838             | 2  | 14 | 46 | 18 | 0.23    |

| Chr14 | rs# or MIT# (if available) | Location in bp (2007) | NA | BB | BA | AA | P value |
|-------|----------------------------|-----------------------|----|----|----|----|---------|
| m1    | <i>rs3709957</i>           | 15597413              | 1  | 15 | 45 | 29 | 0.11    |
| m2    | <i>rs3687985</i>           | 26434864              | 6  | 14 | 49 | 21 | 0.17    |
| m3    | <i>rs3699992</i>           | 31470184              | 1  | 14 | 46 | 29 | 0.076   |
| m4    | <i>rs3704957</i>           | 52811460              | 2  | 12 | 51 | 25 | 0.048   |
| m5    | <i>rs3706792</i>           | 79390536              | 1  | 15 | 57 | 17 | 0.029   |
| m6    | <i>rs3707135</i>           | 87652871              | 3  | 15 | 58 | 14 | 0.0079  |
| m7    | <i>rs6379772</i>           | 99953391              | 1  | 18 | 54 | 17 | 0.13    |
| m8    | <i>rs3683181</i>           | 112084315             | 3  | 18 | 50 | 19 | 0.37    |
| m9    | <i>rs3665550</i>           | 119425508             | 1  | 21 | 47 | 21 | 0.87    |
| m10   | <i>rs6363142</i>           | 122444361             | 3  | 19 | 52 | 16 | 0.17    |

| Chr15 | rs# or MIT# (if available) | Location in bp (2007) | NA | BB | BA | AA | P value |
|-------|----------------------------|-----------------------|----|----|----|----|---------|
| m1    | <i>rs6190892</i>           | 10404432              | 0  | 21 | 40 | 22 | 0.94    |
| m2    | <i>rs3707147</i>           | 19093422              | 5  | 21 | 36 | 21 | 0.79    |
| m3    | <i>rs3669912</i>           | 24967836              | 3  | 23 | 41 | 16 | 0.53    |
| m4    | <i>rs3692586</i>           | 42453452              | 0  | 23 | 39 | 21 | 0.82    |
| m5    | <i>rs3682404</i>           | 54262541              | 1  | 22 | 39 | 21 | 0.90    |
| m6    | <i>rs3708194</i>           | 67561558              | 1  | 23 | 37 | 22 | 0.67    |
| m7    | <i>rs6406941</i>           | 80209103              | 0  | 22 | 40 | 21 | 0.94    |
| m8    | <i>rs6288751</i>           | 91146287              | 0  | 21 | 41 | 21 | 0.99    |

| Chr16 | rs# or MIT# (if available) | Location in bp (2007) | NA | BB | BA | AA | P value |
|-------|----------------------------|-----------------------|----|----|----|----|---------|
| m1    | <i>rs3722676</i>           | 7332949               | 0  | 19 | 44 | 28 | 0.39    |
| m2    | <i>rs3682490</i>           | 35819624              | 1  | 20 | 43 | 27 | 0.53    |
| m3    | <i>rs3654046</i>           | 44483805              | 0  | 21 | 43 | 27 | 0.59    |
| m4    | <i>rs3658486</i>           | 56449883              | 1  | 18 | 46 | 26 | 0.48    |
| m5    | NA                         | 74037040              | 0  | 19 | 45 | 27 | 0.49    |

| Chr17 | rs# or MIT# (if available) | Location in bp (2007) | NA | BB | BA | AA | P value |
|-------|----------------------------|-----------------------|----|----|----|----|---------|
| m1    | <i>rs3712728</i>           | 17702906              | 6  | 17 | 40 | 27 | 0.28    |
| m2    | NA                         | 20220469              | 13 | 15 | 36 | 26 | 0.18    |
| m3    | <i>rs6357023</i>           | 35744610              | 5  | 16 | 41 | 28 | 0.17    |
| m4    | <i>rs3726018</i>           | 35771262              | 18 | 15 | 33 | 24 | 0.25    |
| m5    | NA                         | 51584071              | 13 | 12 | 41 | 24 | 0.13    |
| m6    | <i>rs6217678</i>           | 66235348              | 5  | 13 | 50 | 22 | 0.10    |
| m7    | NA                         | 67150414              | 21 | 12 | 37 | 20 | 0.33    |
| m8    | NA                         | 79859508              | 14 | 13 | 44 | 19 | 0.24    |
| m9    | <i>rs3691225</i>           | 88010097              | 5  | 20 | 42 | 23 | 0.89    |
| m10   | NA                         | 93504119              | 20 | 20 | 30 | 20 | 0.49    |

| Chr18 | rs# or MIT# (if available) | Location in bp (2007) | NA | BB | BA | AA | P value |
|-------|----------------------------|-----------------------|----|----|----|----|---------|
| m1    | NA                         | 3513387               | 2  | 26 | 50 | 14 | 0.12    |
| m2    | <i>rs13483221</i>          | 15408257              | 9  | 19 | 48 | 16 | 0.32    |
| m3    | NA                         | 32717270              | 0  | 23 | 49 | 20 | 0.75    |
| m4    | NA                         | 44614321              | 13 | 20 | 41 | 18 | 0.90    |
| m5    | NA                         | 61794775              | 1  | 26 | 46 | 19 | 0.58    |
| m6    | NA                         | 75054730              | 9  | 20 | 46 | 17 | 0.55    |
| m7    | NA                         | 88445711              | 2  | 23 | 49 | 18 | 0.53    |

| Chr19 | rs# or MIT# (if available) | Location in bp (2007) | NA | BB | BA | AA | P value |
|-------|----------------------------|-----------------------|----|----|----|----|---------|
| m1    | <i>rs6323147</i>           | 9969714               | 2  | 22 | 45 | 19 | 0.82    |
| m2    | <i>rs3681258</i>           | 27964978              | 1  | 21 | 56 | 10 | 0.0069  |
| m3    | <i>rs3706846</i>           | 37995436              | 1  | 24 | 53 | 10 | 0.013   |
| m4    | <i>rs6169063</i>           | 45603164              | 1  | 25 | 50 | 12 | 0.054   |
| m5    | <i>rs3708392</i>           | 55690780              | 1  | 24 | 52 | 11 | 0.027   |
| m6    | <i>rs3723935</i>           | 58537250              | 1  | 24 | 48 | 15 | 0.25    |

| ChrX | rs# or MIT# (if available) | Location in bp (2007) | NA | BB | BA | AA | P value |
|------|----------------------------|-----------------------|----|----|----|----|---------|
| m1   | NA                         | 5278564               | 0  | 42 | -  | 47 | 0.60    |
| m2   | NA                         | 45765715              | 0  | 41 | -  | 48 | 0.46    |
| m3   | <i>rs6411410</i>           | 49412504              | 0  | 43 | -  | 46 | 0.75    |
| m4   | <i>rs13483815</i>          | 68130578              | 0  | 49 | -  | 40 | 0.34    |
| m5   | <i>rs3686696</i>           | 82416327              | 0  | 50 | -  | 39 | 0.24    |
| m6   | <i>rs3699508</i>           | 103295401             | 1  | 50 | -  | 38 | 0.20    |
| m7   | <i>rs6205221</i>           | 126830240             | 0  | 52 | -  | 37 | 0.11    |
| m8   | <i>rs6323976</i>           | 139773177             | 0  | 50 | -  | 39 | 0.24    |
| m9   | <i>rs3720812</i>           | 152151349             | 1  | 51 | -  | 37 | 0.14    |
| m11  | <i>rs3673053</i>           | 162467486             | 1  | 50 | -  | 38 | 0.20    |
| m12  | NA                         | 163190188             | 1  | 50 | -  | 38 | 0.20    |

**Supplementary Table 1B.** Markers used in the B6 X A/J intercross are provided. The location in the 2004 assembly and 2007 assembly (build 27) are provided. One marker on chromosome 4 mapped to only the 2004 analysis but was included in the analysis because no excessive recombination occurred between this marker and other markers on chromosome 4 (data not shown).

| 2004_pos    | RS name(s) | 2007_pos    |
|-------------|------------|-------------|
| 1-3671591   | rs30610098 | 1-3658405   |
| 1-22136158  | rs31130534 | 1-21911999  |
| 1-40907247  | rs3677272  | 1-40638747  |
| 1-63000406  | rs30661498 | 1-62654433  |
| 1-101081908 | rs31967942 | 1-103086280 |
| 1-116376810 | rs30523241 | 1-118252818 |
| 1-155690774 | rs32026431 | 1-157548417 |
| 1-173501172 | rs31066027 | 1-175301166 |
| 1-192385385 | rs6277122  | 1-194314119 |
| 2-3129136   | rs33618629 | 2-3098565   |
| 2-20429144  | rs27120251 | 2-20295020  |
| 2-42696217  | rs33122860 | 2-42591746  |
| 2-62744557  | rs28002552 | 2-62643978  |
| 2-80023310  | rs28324484 | 2-79969408  |
| 2-102087574 | rs27375660 | 2-102033747 |
| 2-122027187 | rs33269443 | 2-122103900 |
| 2-143676514 | rs32853364 | 2-143750271 |
| 2-161762189 | rs27333766 | 2-161524576 |
| 2-181492134 | rs27670658 | 2-181538722 |
| 3-9673584   | rs6387423  | 3-9622963   |
| 3-27844292  | rs31636604 | 3-27977931  |
| 3-42196443  | rs3665179  | 3-42168694  |
| 3-66475292  | rs30760009 | 3-66041817  |
| 3-84707728  | rs31311415 | 3-84108613  |
| 3-103528976 | rs30303620 | 3-103402746 |
| 3-123046608 | rs6381993  | 3-122367462 |
| 3-158998839 | rs30263084 | 3-158035563 |
| 4-3495096   | rs27720774 | 4-3495096   |
| 4-22699320  | rs27745520 | 4-22700352  |
| 4-60185456  | rs13477735 | 4-61518987  |
| 4-79512364  | rs28106227 | 4-80882955  |

|              |            |             |
|--------------|------------|-------------|
| 4-104800190  | rs28187349 | 4-106127154 |
| 4-132324595  | rs27594533 | 4-133425884 |
| 4-154135071  | NA         | NA          |
| 5-3944283    | rs31193261 | 5-3938277   |
| 5-24589699   | rs32285801 | 5-26529917  |
| 5-43903241   | rs33309044 | 5-45679420  |
| 5-90907005   | rs33249065 | 5-92510104  |
| 5-106703942  | rs33582007 | 5-109668667 |
| 5-127292236  | rs33689749 | 5-130230031 |
| 5-147868794  | rs3165172  | 5-151203465 |
| 6-3064139    | rs6392909  | 6-3321606   |
| 6-25227130   | rs52307604 | 6-25337408  |
| 6-43948714   | rs30316067 | 6-43946758  |
| 6-60682722   | rs30915467 | 6-60541414  |
| 6-86639812   | rs30283204 | 6-86259791  |
| 6-107110538  | rs30167841 | 6-106666678 |
| 6-128425070  | rs29972952 | 6-127727818 |
| 6-148956716  | rs30312640 | 6-148760171 |
| 7-3131034    | rs31096534 | 7-3131034   |
| 7-22000936   | rs31295269 | 7-34522873  |
| 7-40227483   | rs32328308 | 7-60023888  |
| 7-58816998   | rs31466348 | 7-78925064  |
| 7-77551668   | rs31962679 | 7-97467612  |
| 7-94601983   | rs31958468 | 7-114478889 |
| 7-113892379  | rs3678246  | 7-133561177 |
| 7-133034540  | rs31152094 | 7-152507460 |
| 8-33522722   | rs32769508 | 8-35626459  |
| 8-52564351   | rs32709278 | 8-54476318  |
| 8-68092295   | rs3704053  | 8-71590847  |
| 8-90830486   | rs33601490 | 8-94031516  |
| 8-109414665  | rs33219858 | 8-112622271 |
| 8-127335507  | rs33152430 | 8-130452279 |
| 9-8297333    | rs29887009 | 9-8307298   |
| 9-29909942   | rs30088824 | 9-29748832  |
| 9-46601023   | rs30282496 | 9-46304162  |
| 9-65755275   | rs29688072 | 9-65363311  |
| 9-104059689  | rs30278935 | 9-104040265 |
| 9-123239895  | rs29596800 | 9-123140595 |
| 10-3064625   | rs29325124 | 10-3064625  |
| 10-24168756  | rs29342973 | 10-24128649 |
| 10-67659501  | rs6242461  | 10-67347694 |
| 10-91696200  | rs29335849 | 10-91391138 |
| 10-108436248 | rs29319568 | 10-         |



|              |            |             |
|--------------|------------|-------------|
|              |            | 108194131   |
|              |            | 10-         |
| 10-128562373 | rs29346747 | 127872663   |
| 11-3245029   | rs26884122 | 11-3250244  |
| 11-20818481  | rs3664865  | 11-20822914 |
| 11-41562800  | rs29438923 | 11-41736567 |
| 11-82490069  | rs29447499 | 11-82690239 |
| 11-98884034  | rs29454222 | 11-99074225 |
|              |            | 11-         |
| 11-117370392 | rs29401815 | 117560577   |
| 12-6966739   | rs13481285 | 12-7021189  |
| 12-27576834  | rs29180162 | 12-33247795 |
| 12-48208329  | rs29136254 | 12-54087593 |
| 12-71176621  | rs29173065 | 12-76989416 |
|              |            | 12-         |
| 12-94567240  | rs29205196 | 101168125   |
|              |            | 12-         |
| 12-114656013 | rs3695641  | 120853081   |
| 13-21657828  | rs29235380 | 13-22369573 |
| 13-40185315  | rs29554010 | 13-40837177 |
| 13-59593019  | rs29240914 | 13-60551422 |
| 13-95931293  | rs29227075 | 13-99961722 |
|              |            | 13-         |
| 13-113669666 | rs29515886 | 117498011   |
| 14-9479331   | rs31071846 | 14-13708217 |
| 14-25722967  | rs6159786  | 14-30497456 |
| 14-53039866  | rs30701326 | 14-61664522 |
|              |            | 14-         |
| 14-93665732  | rs30741554 | 101839948   |
|              |            | 14-         |
| 14-116892781 | rs30112843 | 124994483   |
| 15-6995276   | rs13459145 | 15-7117980  |
| 15-26200284  | rs32299863 | 15-26089855 |
| 15-44588295  | rs31627972 | 15-44397300 |
| 15-68119758  | rs31202853 | 15-67685473 |
| 15-83332522  | rs32192579 | 15-82805161 |
|              |            | 15-         |
| 15-102923981 | rs31786273 | 102272796   |
| 16-5343733   | rs4153209  | 16-5661854  |
| 16-26906913  | rs4165503  | 16-27062967 |
| 16-41204697  | rs4178232  | 16-41339263 |
| 16-61790976  | rs4193306  | 16-61533476 |
| 16-79956413  | rs6166418  | 16-79576183 |
| 17-3233033   | rs33470793 | 17-3232805  |

|             |            |             |
|-------------|------------|-------------|
| 17-25168944 | rs33523502 | 17-26718524 |
| 17-53986422 | rs33567983 | 17-55841880 |
| 17-75163657 | rs29714724 | 17-77086271 |
| 17-93236762 | rs29504100 | 17-94854172 |
| 18-94111109 | rs3683892  | 18-9196200  |
| 18-27201485 | rs13483264 | 18-26919757 |
| 18-46708088 | rs29774134 | 18-46423449 |
| 18-67343528 | rs29723033 | 18-66977944 |
| 18-88763180 | rs30060354 | 18-88445711 |
| 19-8126086  | rs31112038 | 19-9101495  |
| 19-25698132 | rs30759358 | 19-26496830 |
| 19-43193150 | rs31077420 | 19-43930982 |
| X-40497516  | rs31387531 | X-45502408  |
| X-61293280  | rs29043614 | X-66980108  |
| X-78406226  | rs29064179 | X-84100707  |
| X-97534127  | rs3694287  | X-103325110 |
| X-120390061 | rs29112557 | X-126919889 |
| X-133807536 | rs29284868 | X-140350956 |
| X-156445441 | rs31557451 | X-162770708 |

---

**Supplementary Table 2. Relations between parental strain and diet for five obesity-related traits.**

A. Mean and standard deviation for all five traits for each strain-diet combination.

| Trait           | Strain | HFSC  |           | HFCC  |           | LFSC  |           | LFCC  |           |
|-----------------|--------|-------|-----------|-------|-----------|-------|-----------|-------|-----------|
|                 |        | Mean  | Std. Dev. |
| MW (grams)      | B6     | 32.85 | 2.84      | 33.32 | 3.67      | 26.44 | 1.44      | 27.06 | 1.27      |
|                 | AJ     | 27.46 | 2.67      | 28.78 | 3.78      | 25.09 | 1.60      | 24.55 | 1.79      |
| FW (grams)      | B6     | 43.70 | 4.82      | 42.19 | 5.66      | 29.04 | 1.90      | 31.01 | 1.71      |
|                 | AJ     | 31.62 | 3.82      | 30.65 | 4.06      | 27.09 | 1.58      | 26.35 | 2.13      |
| EWG (grams/day) | B6     | 0.24  | 0.04      | 0.26  | 0.05      | 0.11  | 0.02      | 0.14  | 0.02      |
|                 | AJ     | 0.17  | 0.04      | 0.16  | 0.05      | 0.09  | 0.02      | 0.11  | 0.03      |
| FWG (grams/day) | B6     | 0.26  | 0.06      | 0.21  | 0.06      | 0.06  | 0.04      | 0.09  | 0.03      |
|                 | AJ     | 0.10  | 0.04      | 0.04  | 0.03      | 0.05  | 0.02      | 0.04  | 0.05      |
| WG (grams/day)  | B6     | 0.25  | 0.04      | 0.24  | 0.05      | 0.09  | 0.02      | 0.12  | 0.02      |
|                 | AJ     | 0.14  | 0.03      | 0.11  | 0.03      | 0.07  | 0.02      | 0.08  | 0.02      |

**B. ANOVA for body weight traits in C57BL/6J and AJ on the four diets.**

| <i>Mid Weight</i>       | df  | Sum Sq  | Mean Sq. | F value  | Pr(>F)    |
|-------------------------|-----|---------|----------|----------|-----------|
| Strain                  | 1   | 1132.41 | 1132.41  | 138.9408 | < 2.2e-16 |
| Fat                     | 1   | 1983.20 | 1983.20  | 243.3272 | < 2.2e-16 |
| Carbohydrate            | 1   | 0.74    | 0.74     | 0.0902   | 0.76412   |
| Strain:Fat              | 1   | 240.52  | 240.52   | 29.5101  | 1.25E-07  |
| Strain:Carbohydrate     | 1   | 4.00    | 4.00     | 0.4911   | 0.48403   |
| Fat:Carbohydrate        | 1   | 2.03    | 2.03     | 0.2487   | 0.6184    |
| Strain:Fat:Carbohydrate | 1   | 35.56   | 35.56    | 4.3626   | 0.03768   |
| Residuals               | 267 | 2176.14 | 8.15     |          |           |

| <i>Final Weight</i> | df  | Sum Sq | Mean Sq. | F value  | Pr(>F)  |
|---------------------|-----|--------|----------|----------|---------|
| Strain              | 1   | 4874.8 | 4874.8   | 336.9329 | < 2e-16 |
| Fat                 | 1   | 5375.8 | 5375.8   | 371.5609 | < 2e-16 |
| Carbohydrate        | 1   | 10.7   | 10.7     | 0.7385   | 0.39091 |
| Strain:Fat          | 1   | 1381.5 | 1381.5   | 95.4838  | < 2e-16 |
| Strain:Carbohydrate | 1   | 3.9    | 3.9      | 0.2669   | 0.60586 |
| Fat:Carbohydrate    | 1   | 69.1   | 69.1     | 4.7748   | 0.02975 |
| Strain:Fat:Sugar    | 1   | 64.2   | 64.2     | 4.4399   | 0.03604 |
| Residuals           | 267 | 3863.0 | 14.5     |          |         |

| <i>Early Weight Gain</i> | df  | Sum Sq  | Mean Sq. | F value  | Pr(>F)    |
|--------------------------|-----|---------|----------|----------|-----------|
| Strain                   | 1   | 0.37673 | 0.37673  | 217.1116 | < 2.2e-16 |
| Fat                      | 1   | 0.96209 | 0.96209  | 554.4582 | < 2.2e-16 |
| Carbohydrate             | 1   | 0.00577 | 0.00577  | 3.3258   | 0.06932   |
| Strain:Fat               | 1   | 0.14022 | 0.14022  | 80.8096  | < 2.2e-16 |
| Strain:Carbohydrate      | 1   | 0.00074 | 0.00074  | 0.4267   | 0.51417   |
| Fat:Carbohydrate         | 1   | 0.04996 | 0.04996  | 28.7946  | 1.75E-07  |
| Strain:Fat:Carbohydrate  | 1   | 0.00605 | 0.00605  | 3.4870   | 0.06295   |
| Residuals                | 267 | 0.46329 | 0.00174  |          |           |

| <i>Weight Gain</i>      | df  | Sum Sq  | Mean Sq. | F value  | Pr(>F)    |
|-------------------------|-----|---------|----------|----------|-----------|
| Strain                  | 1   | 0.47108 | 0.47108  | 423.3437 | < 2.2e-16 |
| Fat                     | 1   | 0.67753 | 0.67753  | 608.8731 | < 2.2e-16 |
| Carbohydrate            | 1   | 0.00122 | 0.00122  | 1.0981   | 0.2956    |
| Strain:Fat              | 1   | 0.16580 | 0.16580  | 148.9996 | < 2.2e-16 |
| Strain:Carbohydrate     | 1   | 0.00237 | 0.00237  | 2.1271   | 0.1459    |
| Fat:Carbohydrate        | 1   | 0.03000 | 0.03000  | 26.9558  | 4.13E-07  |
| Strain:Fat:Carbohydrate | 1   | 0.00182 | 0.00182  | 1.6367   | 0.2019    |
| Residuals               | 267 | 0.29711 | 0.00111  |          |           |

| <i>Final Weight Gain</i> | df  | Sum Sq  | Mean Sq. | F value  | Pr(>F)    |
|--------------------------|-----|---------|----------|----------|-----------|
| Strain                   | 1   | 0.65062 | 0.65062  | 350.5718 | < 2.2e-16 |
| Fat                      | 1   | 0.39274 | 0.39274  | 211.6208 | < 2.2e-16 |
| Carbohydrate             | 1   | 0.00015 | 0.00015  | 0.0831   | 0.773338  |
| Strain:Fat               | 1   | 0.22079 | 0.22079  | 118.9693 | < 2.2e-16 |
| Strain:Carbohydrate      | 1   | 0.01901 | 0.01901  | 10.2424  | 0.001538  |
| Fat:Carbohydrate         | 1   | 0.01439 | 0.01439  | 7.7512   | 0.005751  |
| Strain:Fat:Carbohydrate  | 1   | 0.00006 | 0.00006  | 0.0326   | 0.856947  |
| Residuals                | 267 | 0.49552 | 0.00186  |          |           |

**Supplementary Table 3A. HFSC CSS survey results (O-SRV).**

The mean trait value, standard deviation and P value derived from a t-test comparing each CSS to the parental C57BL/6J strain are listed. The P values reflect correction for multiple testing.



**Supplementary Table 3B. LFCC CSS survey results.**

The mean trait value, standard deviation and P value derived from a t-test comparing each CSS to the parental C57BL/6J strain are listed. The P values reflect correction for multiple testing.



| LFC# | Year | W(gross) |       | M(gross) |      | F(gross) |       | W(gross) |       | S(gross) |     | P(gross) |      |     |       |       |     |     |       |
|------|------|----------|-------|----------|------|----------|-------|----------|-------|----------|-----|----------|------|-----|-------|-------|-----|-----|-------|
|      |      | Men      | St/De | Prde     | Men  | St/De    | Prde  | Men      | St/De | Prde     | Men | St/De    | Prde | Men | St/De | Prde  |     |     |       |
| 1531 | 2    | 8.5      | 16    | nd       | 20.6 | 17       | nd    | 20.0     | 17    | nd       | 0.2 | 0.2      | nd   | 1.4 | 0.2   | nd    | 0.9 | 0.3 | nd    |
| 1531 | 3    | 8.0      | 12    | nd       | 24.5 | 13       | nd    | 26.5     | 23    | nd       | 0.0 | 0.2      | nd   | 0.1 | 0.3   | nd    | 0.4 | 0.5 | nd    |
| 1531 | 7    | 8.0      | 13    | 0.07     | 20.2 | 16       | 0.77  | 0.3      | 2.7   | 1        | 0.5 | 0.4      | 0.53 | 0.3 | 0.3   | <0.01 | 0.5 | 0.4 | 0.07  |
| 1531 | 8    | 8.3      | 14    | 0.01     | 23.2 | 13       | 0.97  | 0.5      | 2.4   | 0.04     | 0.4 | 0.3      | 0.92 | 0.2 | 0.5   | 0.01  | 0.6 | 0.2 | 0.04  |
| 1531 | 4    | 12.2     | 27    | <0.01    | 25.7 | 19       | <0.01 | 26.3     | 13    | <0.01    | 0.4 | 0.2      | 0.94 | 0.2 | 0.4   | 0.07  | 0.6 | 0.2 | 0.52  |
| 1531 | 8    | 9.0      | 15    | <0.01    | 24.1 | 23       | 0.01  | 26.5     | 2.7   | <0.01    | 0.2 | 0.3      | 1    | 0.6 | 0.4   | 1     | 0.6 | 0.3 | 0.04  |
| 1531 | 2    | 8.6      | 24    | 0.01     | 23.4 | 17       | 0.01  | 23.3     | 22    | 0.75     | 0.4 | 0.4      | 0.97 | 0.9 | 0.6   | 0.87  | 0.9 | 0.5 | 1     |
| 1531 | 7    | 8.5      | 12    | 0.48     | 20.7 | 13       | 0.92  | 20.4     | 22    | 0.06     | 0.2 | 0.3      | 1    | 0.9 | 0.5   | 0.02  | 0.5 | 0.2 | 0.02  |
| 1531 | 5    | 0.4      | 10    | 0.03     | 20.0 | 12       | 1     | 20.4     | 26    | 0.74     | 0.1 | 0.4      | 1    | 0.7 | 0.8   | 0.97  | 0.3 | 0.4 | <0.01 |
| 1531 | 8    | 0.0      | 23    | 1        | 20.0 | 16       | 1     | 20.2     | 20    | 0.99     | 0.1 | 0.2      | 1    | 0.5 | 0.4   | 1     | 0.6 | 0.3 | 0.05  |
| 1531 | 2    | 8.6      | 10    | 0.07     | 24.4 | 13       | 0.06  | 26.6     | 16    | <0.01    | 0.0 | 0.3      | 0.92 | 1.4 | 0.5   | 1     | 0.5 | 0.3 | 0.02  |
| 1531 | 2    | 8.0      | 13    | 0.01     | 24.3 | 13       | 0.01  | 25.7     | 20    | <0.01    | 0.0 | 0.4      | 0.97 | 1.4 | 0.7   | 1     | 0.3 | 0.3 | <0.01 |
| 1531 | 2    | 0.4      | 32    | 0.53     | 23.0 | 13       | 0.97  | 21.9     | 12    | 0.02     | 0.0 | 0.3      | 0.94 | 0.5 | 0.4   | 1     | 0.4 | 0.2 | <0.01 |
| 1531 | 7    | 8.6      | 13    | 0.01     | 23.4 | 14       | 0.92  | 26.3     | 13    | 0.06     | 0.3 | 0.2      | 1    | 0.9 | 0.5   | 0.01  | 0.6 | 0.2 | 0.01  |
| 1531 | 2    | 8.0      | 22    | <0.01    | 20.0 | 24       | 0.94  | 20.0     | 24    | 0.06     | 0.3 | 0.3      | 0.92 | 0.9 | 0.5   | 0.92  | 0.6 | 0.2 | 0.06  |
| 1531 | 8    | 8.4      | 26    | 1        | 20.0 | 12       | 1     | 20.0     | 14    | 0.07     | 0.0 | 0.2      | 0.94 | 1.4 | 0.4   | 1     | 0.4 | 0.3 | <0.01 |
| 1531 | 4    | 8.5      | 14    | 1        | 20.0 | 18       | 0.94  | 24.4     | 27    | 1        | 0.2 | 0.2      | 1    | 0.7 | 0.3   | 0.92  | 0.6 | 0.3 | 0.14  |
| 1531 | 3    | 8.2      | 14    | 0.38     | 20.0 | 14       | 1     | 20.4     | 13    | 0.45     | 0.2 | 0.2      | 1    | 0.9 | 0.3   | 0.94  | 0.5 | 0.2 | 0.01  |
| 1531 | 2    | 8.6      | 13    | 0.44     | 23.4 | 13       | 0.01  | 20.5     | 24    | 0.05     | 0.1 | 0.3      | 1    | 0.5 | 0.4   | 1     | 0.6 | 0.3 | 0.02  |
| 1531 | 8    | 8.0      | 13    | 0.07     | 23.0 | 12       | 0.95  | 20.4     | 16    | 0.02     | 0.3 | 0.3      | 1    | 0.6 | 0.5   | 0.97  | 0.9 | 0.3 | 1     |
| 1531 | 3    | 20.0     | 24    | 1        | 20.5 | 17       | 0.01  | 20.0     | 14    | 1        | 0.1 | 0.2      | 1    | 1.4 | 0.4   | 1     | 0.6 | 0.3 | 0.26  |
| 1531 | 8    | 8.0      | 13    | 1        | 20.4 | 13       | 1     | 20.9     | 17    | 0.48     | 0.0 | 0.2      | 0.92 | 0.3 | 0.3   | 1     | 0.6 | 0.2 | 0.01  |
| 1531 | 2    | 0.0      | 24    | 0.63     | 20.7 | 16       | 1     | 20.5     | 22    | 0.67     | 0.1 | 0.2      | 1    | 0.6 | 0.4   | 0.92  | 0.5 | 0.2 | 0.01  |
| 1531 | 2    | 0.0      | 12    | 1        | 20.5 | 17       | 0.92  | 24.6     | 24    | 1        | 0.3 | 0.3      | 0.99 | 0.7 | 0.4   | 0.92  | 0.7 | 0.3 | 0.97  |

**Supplementary Table 3C. Gene-diet interactions for HFSC (O-SRV) and LFCC surveys for the growth and obesity-related traits.**

To compare the response of individual CSSs to the response of C57BL/6J to the HFSC versus LFCC diets, the effect of the HFSC diet (final weight on HFSC diet compared to final weight on LFCC diet) for each CSS was compared to that of C57BL/6J. The difference between the mean trait value for the HFSC – LFCC diets, the t-statistic derived from an unpaired t-test, and P value derived from the t-test are presented. Multiple testing was taken into account (see Materials and Methods).



| Stn  | W     |     |      | M     |     |      | J     |     |      | A     |     |      | M     |     |      |
|------|-------|-----|------|-------|-----|------|-------|-----|------|-------|-----|------|-------|-----|------|
|      | prsnj | Isi | Pada |
| 3361 | 49    | nl  | nl   | 53    | nl  | nl   | 177   | nl  | nl   | 113   | nl  | nl   | 15    | nl  | nl   |
| 3362 | 470   | nl  | nl   | 292   | nl  | nl   | 527   | nl  | nl   | 106   | nl  | nl   | 106   | nl  | nl   |
| 3363 | 47    | 182 | 1    | 164   | 107 | 1    | 116   | 104 | 1    | 112   | 116 | 1    | 114   | 169 | 1    |
| 3364 | 711   | 412 | <100 | 612   | 314 | 1    | 143   | 45  | 1047 | 100   | 312 | 123  | 100   | 171 | <100 |
| 3365 | 18    | 400 | <100 | 53    | 140 | 1    | 52    | 50  | 1013 | 112   | 170 | <100 | 11    | 76  | <100 |
| 3366 | 45    | 103 | 1    | 57    | 217 | 103  | 52    | 44  | 1017 | 107   | 570 | 1025 | 105   | 494 | 1011 |
| 3367 | 113   | 434 | 1000 | 165   | 102 | 1    | 117   | 14  | 1024 | 106   | 452 | 1012 | 119   | 285 | 1214 |
| 3368 | 15    | 304 | 1015 | 171   | 265 | 1012 | 48    | 43  | 1025 | 112   | 144 | <100 | 111   | 63  | <100 |
| 3369 | 10    | 431 | 1005 | 111   | 494 | 1014 | 14    | 16  | <100 | 111   | 100 | <100 | 111   | 163 | <100 |
| 3370 | 49    | 100 | 1    | 171   | 302 | 1017 | 35    | 31  | 1012 | 105   | 513 | 1012 | 106   | 441 | 1012 |
| 3371 | 77    | 710 | <100 | 114   | 302 | 1021 | 124   | 46  | 1000 | 111   | 314 | 1010 | 117   | 370 | 1021 |
| 3372 | 13    | 470 | 1005 | 112   | 311 | 1    | 33    | 14  | 1000 | 111   | 140 | 1017 | 111   | 361 | 1435 |
| 3373 | 16    | 370 | 1019 | 23    | 291 | 1024 | 74    | 24  | 1000 | 111   | 144 | 1012 | 111   | 345 | <100 |
| 3374 | 10    | 104 | 1    | 21    | 140 | 1014 | 54    | 50  | 1017 | 117   | 344 | 1012 | 111   | 371 | <100 |
| 3375 | 14    | 430 | 1014 | 43    | 107 | 1    | 76    | 10  | 1024 | 111   | 363 | <100 | 112   | 121 | <100 |
| 3376 | 110   | 163 | 1019 | 152   | 210 | 1012 | 74    | 17  | 1024 | 111   | 210 | 1011 | 112   | 161 | 1022 |
| 3377 | 45    | 101 | 1005 | 115   | 212 | 1017 | 112   | 57  | <100 | 111   | 440 | 1012 | 111   | 361 | 1014 |
| 3378 | 110   | 101 | 1    | 431   | 101 | 1    | 72    | 24  | 1000 | 111   | 310 | 1021 | 111   | 361 | 1019 |
| 3379 | 100   | 101 | 1    | 117   | 310 | 1014 | 54    | 45  | 1017 | 111   | 470 | 1016 | 111   | 285 | 1024 |
| 3380 | 111   | 310 | 1015 | 145   | 317 | 1012 | 58    | 17  | 1004 | 111   | 470 | 1015 | 111   | 362 | <100 |
| 3381 | 121   | 101 | 1    | 63    | 416 | 1    | 124   | 17  | 1    | 115   | 414 | 1000 | 111   | 121 | 1    |
| 3382 | 112   | 105 | 1    | 171   | 314 | 1015 | 115   | 41  | 1010 | 111   | 310 | 1117 | 117   | 461 | 1    |
| 3383 | 45    | 100 | 1    | 114   | 317 | 1011 | 57    | 17  | 1017 | 111   | 470 | 1019 | 111   | 310 | 1014 |
| 3384 | 117   | 140 | 1014 | 114   | 310 | 1014 | 45    | 45  | 1011 | 111   | 140 | 1016 | 112   | 101 | 1015 |

**Supplementary Table 4A. Supplementary Table 4A. HFSC CSS survey replicate – R-WOL.**

The mean, standard deviation and P value derived from an unpaired t-test with comparisons to C57BL/6J are listed. The P values were corrected to account for multiple hypothesis testing.

| R-WOL Strain | n  | IW (grams) |         |             |         | FW (grams) |         |             |         | BMI (g/cm <sup>3</sup> ) |         |             |         |
|--------------|----|------------|---------|-------------|---------|------------|---------|-------------|---------|--------------------------|---------|-------------|---------|
|              |    | Mean       | Std Dev | T statistic | P Value | Mean       | Std Dev | T statistic | P Value | Mean                     | Std Dev | T statistic | P value |
| C57BL/6J     | 29 | 18.45      | 1.38    | nd          | nd      | 45.37      | 5.25    | nd          | nd      | 0.40                     | 0.04    | nd          | nd      |
| A/J          | 30 | 18.26      | 1.62    | nd          | nd      | 31.32      | 3.15    | nd          | nd      | 0.31                     | 0.02    | nd          | nd      |
| CSS-1        | 26 | 15.64      | 2.53    | -4.218      | 0.0016  | 45.83      | 4.86    | 0.337       | 1       | 0.41                     | 0.03    | 0.136       | 1       |
| CSS-2        | 22 | 15.18      | 3.22    | -4.700      | 0.0002  | 44.11      | 5.71    | -0.886      | 1       | 0.41                     | 0.05    | 0.536       | 1       |
| CSS-3        | 16 | 18.37      | 1.58    | -0.115      | 1       | 0.33       | 0.02    | -6.580      | <0.0001 | 0.33                     | 0.02    | -5.763      | <0.0001 |
| CSS-4        | 25 | 17.79      | 1.09    | -0.980      | 1       | 36.23      | 4.18    | -6.663      | <0.0001 | 0.33                     | 0.03    | -6.557      | <0.0001 |
| CSS-5        | 21 | 16.89      | 3.26    | -2.206      | 0.5905  | 38.99      | 5.49    | -4.426      | 0.0008  | 0.35                     | 0.04    | -4.410      | 0.0008  |
| CSS-6        | 24 | 18.25      | 3.25    | -0.296      | 1       | 35.44      | 4.64    | -7.158      | <0.0001 | 0.34                     | 0.04    | -6.130      | <0.0001 |
| CSS-7        | 22 | 17.50      | 1.70    | -1.367      | 0.9965  | 31.78      | 3.00    | -9.556      | <0.0001 | 0.30                     | 0.03    | -9.372      | <0.0001 |
| CSS-8        | 17 | 17.40      | 2.70    | -1.397      | 0.9951  | 37.12      | 4.19    | -5.369      | <0.0001 | 0.34                     | 0.03    | -5.360      | <0.0001 |
| CSS-9        | 19 | 16.09      | 3.63    | -3.245      | 0.0548  | 44.15      | 5.88    | -0.824      | 1       | 0.39                     | 0.04    | -1.052      | 1       |
| CSS-10       | 25 | 18.49      | 1.61    | 0.052       | 1       | 37.92      | 6.42    | -5.431      | <0.0001 | 0.35                     | 0.05    | -5.195      | <0.0001 |
| CSS-11       | 19 | 16.52      | 2.09    | -2.657      | 0.2559  | 38.77      | 4.92    | -4.448      | 0.0007  | 0.36                     | 0.04    | -3.590      | 0.0176  |
| CSS-12       | 26 | 16.66      | 1.63    | -2.690      | 0.2376  | 38.55      | 3.70    | -5.019      | <0.0001 | 0.37                     | 0.03    | -3.460      | 0.0275  |
| CSS-13       | 20 | 16.35      | 2.73    | -2.931      | 0.1321  | 34.48      | 4.31    | -7.450      | <0.0001 | 0.33                     | 0.05    | -6.727      | <0.0001 |
| CSS-14       | 23 | 17.97      | 2.09    | -0.026      | 1       | 37.83      | 2.43    | -5.370      | <0.0001 | 0.35                     | 0.02    | -4.714      | 0.0002  |
| CSS-15       | 22 | 17.73      | 3.02    | -1.044      | 1       | 38.20      | 5.78    | -5.041      | <0.0001 | 0.35                     | 0.04    | -5.110      | <0.0001 |
| CSS-16       | 21 | 15.81      | 3.29    | -3.741      | 0.0100  | 37.30      | 3.52    | -5.599      | <0.0001 | 0.34                     | 0.03    | -5.357      | <0.0001 |
| CSS-17       | 30 | 18.48      | 2.04    | 0.035       | 1       | 34.73      | 3.88    | -8.127      | <0.0001 | 0.32                     | 0.03    | -7.995      | <0.0001 |
| CSS-18       | 18 | 17.79      | 1.98    | -0.893      | 1       | 44.78      | 6.60    | -0.390      | 1       | 0.41                     | 0.05    | 0.747       | 1       |
| CSS-19       | 20 | 19.23      | 1.90    | 1.089       | 0.9999  | 45.28      | 8.30    | -0.062      | 1       | 0.41                     | 0.06    | 0.239       | 1       |
| CSS-X        | 14 | 16.23      | 1.95    | -2.774      | 0.1962  | 39.24      | 5.29    | -3.744      | 0.0099  | 0.37                     | 0.04    | -2.546      | 0.3266  |
| CSS-Y        | 18 | 17.95      | 2.87    | -0.682      | 1       | 36.73      | 4.23    | -5.725      | <0.0001 | 0.35                     | 0.03    | -4.809      | 0.0001  |
| CSS-Mito     | 31 | 18.36      | 2.08    | -0.150      | 1       | 41.69      | 6.10    | -2.831      | 0.1705  | 0.37                     | 0.05    | -3.207      | 0.0614  |

**Supplementary Table 4B. HFSC CSS survey replicate - R-ARC.**

The mean, standard deviation and P value derived from an unpaired t-test with comparisons to C57BL/6J are listed. The P values were corrected to account for multiple testing.

| R-ARC Strain | n  | IW (grams) |         |             |         | FW (grams) |         |             |         | BMI (g/cm <sup>2</sup> ) |         |             |         |
|--------------|----|------------|---------|-------------|---------|------------|---------|-------------|---------|--------------------------|---------|-------------|---------|
|              |    | Mean       | Std Dev | T statistic | P Value | Mean       | Std Dev | T statistic | P Value | Mean                     | Std Dev | T statistic | P value |
| C57BL/6J     | 20 | 21.73      | 1.21    | nd          | nd      | 46.68      | 3.98    | nd          | nd      | 0.41                     | 0.04    | nd          | nd      |
| A/J          | 6  | 16.82      | 1.09    | nd          | nd      | 30.94      | 2.91    | nd          | nd      | 0.29                     | 0.03    | nd          | nd      |
| CSS-1        | 7  | 19.98      | 1.33    | -0.900      | 0.4084  | 46.78      | 3.90    | 0.93        | 1       | 0.42                     | 0.04    | -0.495      | 1       |
| CSS-2        | 11 | 20.26      | 2.55    | -2.370      | 0.4384  | 46.98      | 6.27    | 0.05        | 1       | 0.42                     | 0.04    | 0.589       | 0.9998  |
| CSS-3        | 11 | 18.26      | 1.42    | -2.330      | <0.0001 | 34.92      | 5.08    | 0.18        | <0.0001 | 0.33                     | 0.03    | 1.114       | <0.0001 |
| CSS-4        | 23 | 18.88      | 1.88    | -5.495      | <0.0001 | 37.22      | 3.48    | -6.81       | <0.0001 | 0.34                     | 0.03    | -5.815      | <0.0001 |
| CSS-5        | 24 | 18.40      | 1.84    | -5.536      | <0.0001 | 40.35      | 3.68    | -6.72       | 0.0005  | 0.36                     | 0.04    | -6.522      | 0.0036  |
| CSS-6        | 23 | 19.91      | 1.10    | -6.548      | 0.0196  | 36.84      | 3.41    | -4.54       | <0.0001 | 0.33                     | 0.03    | -4.015      | <0.0001 |
| CSS-7        | 23 | 19.85      | 2.79    | -3.539      | 0.0129  | 34.67      | 4.25    | -7.00       | <0.0001 | 0.32                     | 0.03    | -6.551      | <0.0001 |
| CSS-8        | 22 | 18.84      | 1.09    | -3.662      | <0.0001 | 38.15      | 4.30    | -8.54       | <0.0001 | 0.34                     | 0.03    | -7.752      | <0.0001 |
| CSS-9        | 22 | 20.91      | 1.85    | -5.562      | 0.9525  | 48.37      | 4.87    | -6.00       | 0.9992  | 0.42                     | 0.04    | -5.929      | 1       |
| CSS-10       | 25 | 19.99      | 1.44    | -1.584      | 0.0255  | 38.91      | 5.96    | 1.19        | <0.0001 | 0.34                     | 0.03    | 0.953       | <0.0001 |
| CSS-11       | 20 | 21.01      | 1.60    | -3.459      | 0.9935  | 42.07      | 5.86    | -5.63       | 0.0625  | 0.38                     | 0.04    | -5.946      | 0.2220  |
| CSS-12       | 24 | 20.91      | 1.37    | -1.354      | 0.9444  | 40.89      | 4.84    | -3.17       | 0.0022  | 0.37                     | 0.04    | -2.669      | 0.0088  |
| CSS-13       | 6  | 18.06      | 0.89    | -1.608      | 0.0002  | 36.16      | 5.25    | -4.15       | 0.0001  | 0.33                     | 0.03    | -3.783      | 0.0001  |
| CSS-14       | 20 | 19.49      | 1.74    | -4.692      | 0.0018  | 40.52      | 4.21    | -4.91       | 0.0016  | 0.36                     | 0.04    | -4.882      | 0.0035  |
| CSS-15       | 11 | 21.26      | 1.58    | -4.213      | 1       | 42.41      | 6.50    | -4.23       | 0.3367  | 0.37                     | 0.04    | -4.023      | 0.1438  |
| CSS-16       | 12 | 19.45      | 1.05    | -0.748      | 0.0112  | 39.68      | 3.05    | -2.47       | 0.0021  | 0.35                     | 0.03    | -2.852      | 0.0010  |
| CSS-17       | 24 | 18.74      | 2.44    | -3.708      | <0.0001 | 35.48      | 4.44    | -4.16       | <0.0001 | 0.32                     | 0.03    | -4.348      | <0.0001 |
| CSS-18       | 24 | 18.59      | 1.85    | -5.872      | <0.0001 | 46.91      | 4.89    | -8.04       | 1       | 0.43                     | 0.04    | -7.889      | 0.7309  |
| CSS-19       | 19 | 19.40      | 1.65    | -6.167      | 0.0011  | 43.24      | 5.82    | 0.17        | 0.4368  | 0.39                     | 0.04    | 1.968       | 0.9919  |
| CSS-X        | 16 | 20.19      | 1.06    | -4.336      | 0.1932  | 48.12      | 3.06    | -2.33       | 1       | 0.43                     | 0.04    | -1.373      | 0.7891  |
| CSS-Y        | 20 | 19.96      | 0.82    | -2.728      | 0.0374  | 40.90      | 4.15    | 0.93        | 0.0043  | 0.37                     | 0.04    | 1.891       | 0.0772  |
| CSS-Mito     | nd | nd         | nd      | -3.337      | nd      | nd         | nd      | -3.97       | nd      | nd                       | nd      | -3.090      | nd      |

### Supplementary Table 5. LOD scores and adjusted P values for the intercross analysis.

The peak LOD scores and associated P values are provided for each chromosome. Light yellow is used to highlight QTLs that meet the suggestive criteria ( $p < 0.63$ ), and bright yellow is used to highlight QTLs that meet significance criteria ( $p < 0.05$ ).

| Chromosome | FW    |         | MW    |         | IW    |         | BMI   |         | WG    |         | EWG   |         | FWG   |         |
|------------|-------|---------|-------|---------|-------|---------|-------|---------|-------|---------|-------|---------|-------|---------|
|            | LOD   | P Value |
| 1          | 4.465 | 0.054   | 3.568 | 0.292   | 0.710 | 1.000   | 4.885 | 0.024   | 4.660 | 0.036   | 2.884 | 0.723   | 2.232 | 0.988   |
| 2          | 0.698 | 1.000   | 0.842 | 1.000   | 1.206 | 1.000   | 1.060 | 1.000   | 1.263 | 1.000   | 2.039 | 0.996   | 1.076 | 1.000   |
| 3          | 1.460 | 1.000   | 1.036 | 1.000   | 1.083 | 1.000   | 1.280 | 1.000   | 2.280 | 0.990   | 1.784 | 1.000   | 1.688 | 1.000   |
| 4          | 2.308 | 0.991   | 1.385 | 1.000   | 2.467 | 0.971   | 2.462 | 0.971   | 1.113 | 1.000   | 0.728 | 1.000   | 1.938 | 0.999   |
| 5          | 2.280 | 0.979   | 1.749 | 1.000   | 0.996 | 1.000   | 2.197 | 0.988   | 2.003 | 0.998   | 1.876 | 1.000   | 2.873 | 0.718   |
| 6          | 3.785 | 0.259   | 3.293 | 0.539   | 2.400 | 0.984   | 5.031 | 0.023   | 4.257 | 0.109   | 2.167 | 0.998   | 4.337 | 0.094   |
| 7          | 0.844 | 1.000   | 0.653 | 1.000   | 1.905 | 1.000   | 1.987 | 1.000   | 2.818 | 0.840   | 1.633 | 1.000   | 2.330 | 0.989   |
| 8          | 0.282 | 1.000   | 0.484 | 1.000   | 2.148 | 0.995   | 0.311 | 1.000   | 0.679 | 1.000   | 1.361 | 1.000   | 0.363 | 1.000   |
| 9          | 0.569 | 1.000   | 0.486 | 1.000   | 0.307 | 1.000   | 0.726 | 1.000   | 0.935 | 1.000   | 0.504 | 1.000   | 1.217 | 1.000   |
| 10         | 3.214 | 0.550   | 5.827 | 0.006   | 3.166 | 0.583   | 2.638 | 0.906   | 3.507 | 0.369   | 6.803 | 0.001   | 1.182 | 1.000   |
| 11         | 4.025 | 0.114   | 2.270 | 0.974   | 0.721 | 1.000   | 3.918 | 0.143   | 4.605 | 0.041   | 2.589 | 0.866   | 4.165 | 0.091   |
| 12         | 1.612 | 1.000   | 2.282 | 0.987   | 1.695 | 1.000   | 1.426 | 1.000   | 1.381 | 1.000   | 1.880 | 1.000   | 1.059 | 1.000   |
| 13         | 4.139 | 0.151   | 4.874 | 0.042   | 1.812 | 1.000   | 3.264 | 0.535   | 3.393 | 0.456   | 3.093 | 0.648   | 3.242 | 0.548   |
| 14         | 0.511 | 1.000   | 0.405 | 1.000   | 0.953 | 1.000   | 0.608 | 1.000   | 0.523 | 1.000   | 0.308 | 1.000   | 1.053 | 1.000   |
| 15         | 1.005 | 1.000   | 1.499 | 1.000   | 1.897 | 1.000   | 1.134 | 1.000   | 1.008 | 1.000   | 1.758 | 1.000   | 0.388 | 1.000   |
| 16         | 0.984 | 1.000   | 1.041 | 1.000   | 1.118 | 1.000   | 0.969 | 1.000   | 0.632 | 1.000   | 0.750 | 1.000   | 0.986 | 1.000   |
| 17         | 2.721 | 0.860   | 3.477 | 0.382   | 1.945 | 1.000   | 1.986 | 1.000   | 1.953 | 1.000   | 2.277 | 0.989   | 0.667 | 1.000   |
| 18         | 1.995 | 0.997   | 2.407 | 0.935   | 0.778 | 1.000   | 1.898 | 0.999   | 1.645 | 1.000   | 2.551 | 0.875   | 1.938 | 0.999   |
| 19         | 2.208 | 0.993   | 1.815 | 1.000   | 0.887 | 1.000   | 2.089 | 0.998   | 2.320 | 0.982   | 1.371 | 1.000   | 1.964 | 1.000   |
| X          | 1.084 | 1.000   | 0.934 | 1.000   | 0.270 | 1.000   | 1.087 | 1.000   | 1.014 | 1.000   | 0.633 | 1.000   | 1.004 | 1.000   |

**Supplementary Table 6. P values for intercross vs. B6 analysis.**

An unpaired t-test was used to compare the FW of each CSS intercross population to B6. The P values derived from the t-test are presented.

| Chr  | P value |
|------|---------|
| 1.0  | 1.0000  |
| 19.0 | 0.9668  |
| 9.0  | 0.9345  |
| 16.0 | 0.8748  |
| 2.0  | 0.7165  |
| 14.0 | 0.3539  |
| 11.0 | 0.1086  |
| 17.0 | 0.0064  |
| X    | 0.0046  |
| 8.0  | 0.0019  |
| 18.0 | 0.0017  |
| 5.0  | 0.0004  |
| 15.0 | 0.0001  |
| 6.0  | <0.0001 |
| 12.0 | 0.0001  |
| 10.0 | <0.0001 |
| 4.0  | <0.0001 |
| 3.0  | <0.0001 |
| 7.0  | <0.0001 |
| 13.0 | <0.0001 |



Supplementary Table 7. Suggestive QTLs detected in the B6 X A/J intercross.

| <b>Chromosome (trait)</b> | <b>QTL name</b>  | <b>Location (cM)</b> | <b>1.5 LOD support interval (cM)</b> |
|---------------------------|------------------|----------------------|--------------------------------------|
| 6 (FW)                    | <i>Obrq3</i>     | 24                   | 17 - 32                              |
| 6 (WG)                    | <i>Obrq1</i>     | 60                   | 0 - 88                               |
| 10 (FW)                   | <i>Obrq5</i>     | 101                  | 83 - 101                             |
| 10 (BMI)                  | <i>Obrq5</i>     | 101                  | 80 - 101                             |
| 13 (IW)                   | <i>Not named</i> | 53                   | 34 - 74                              |
| 17 (IW)                   | <i>Not named</i> | 17                   | 0 - 48                               |

## SUPPLEMENTARY FIGURES

### **Supplementary Figure 1. Two-dimensional, two-QTL scan.**

The results of the two-dimensional, two-QTL scan are provided. Each phenotype-chromosome combination is represented by a square. The upper-left triangles contain LOD scores comparing a 2-QTL additive model to the best single-QTL model; the lower-right triangles contain LOD scores comparing a 2-QTL interactive model to the best single QTL model. In the color scale at the right, the numbers to the left correspond to the upper-left triangles and the numbers to the right correspond to the lower-right triangles.

**Supplementary Figure 2. Suggestive QTL pairs detected in two-dimensional, two-QTL scan.** Suggestive QTL pairs were identified on chromosome 6 (FWG), 13 (FW), and X (FWG).

In A, for each QTL pair, two curves are provided with each curve representing the evidence for one QTL assuming the presence of the other. In B, for each QTL pair, the mice were sorted by their genotypes at the markers with the peak LOD score. Then, the mean  $\pm$  SEM were calculated for each genotype combination and plotted.

A. Two-QTL LOD Plots

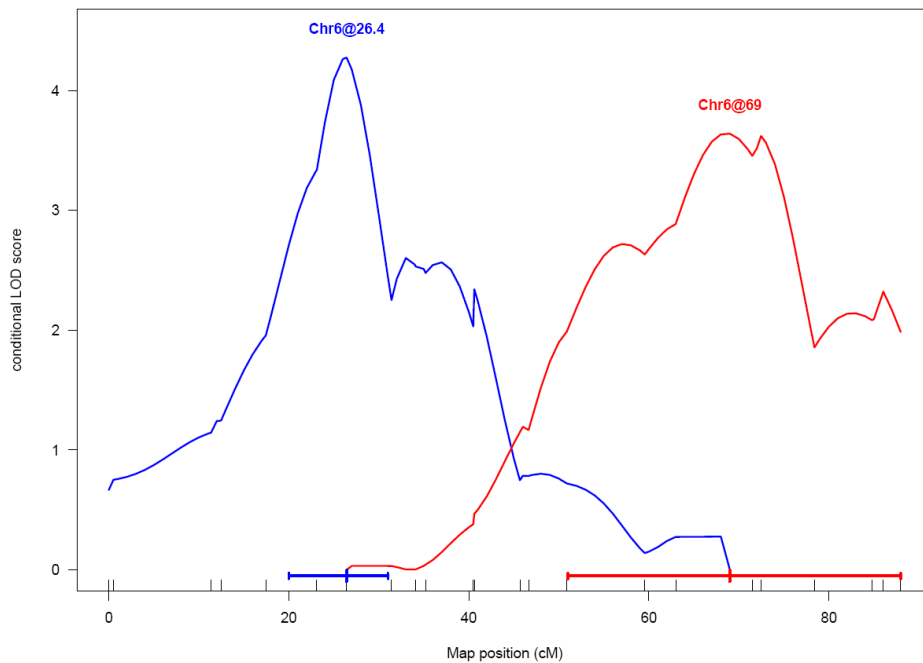

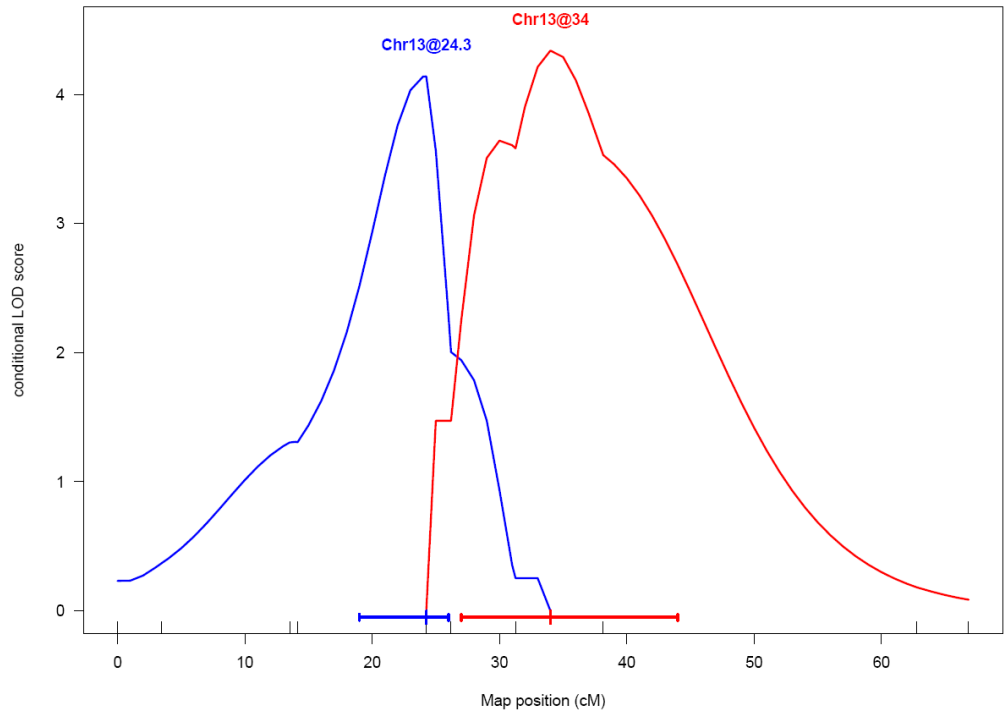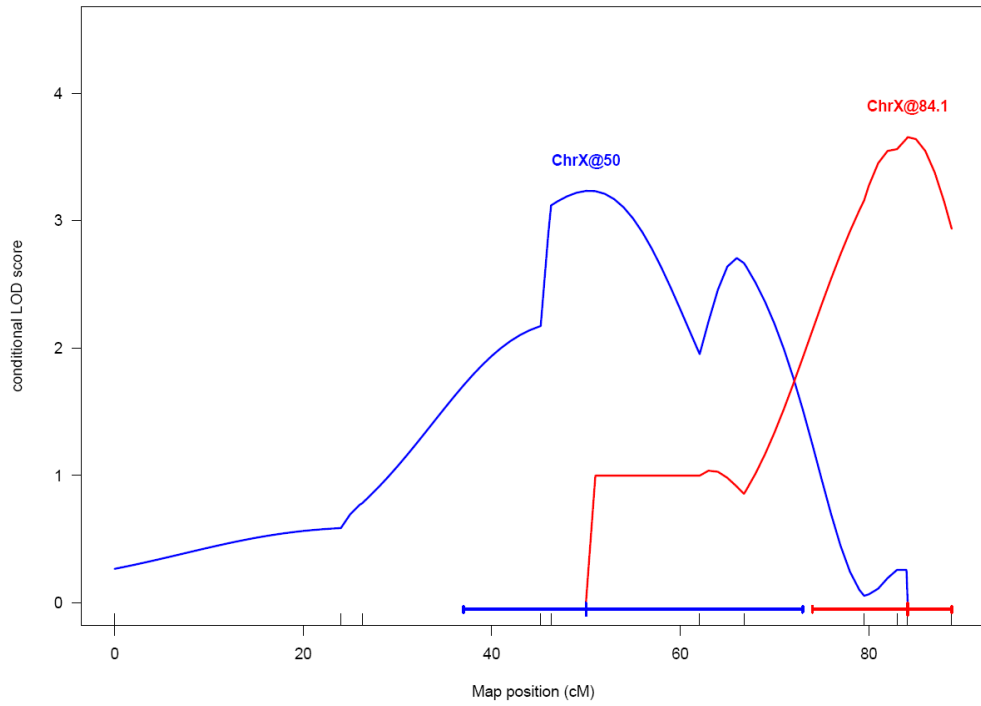

## B. Phenotype Plots

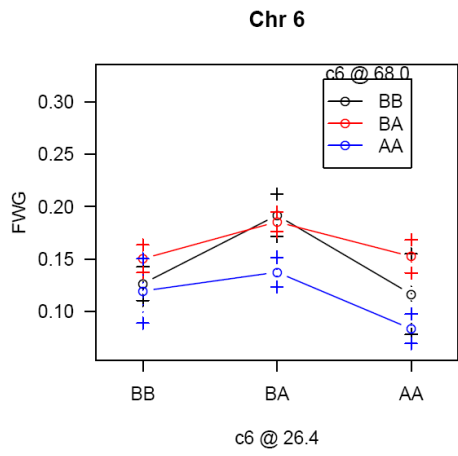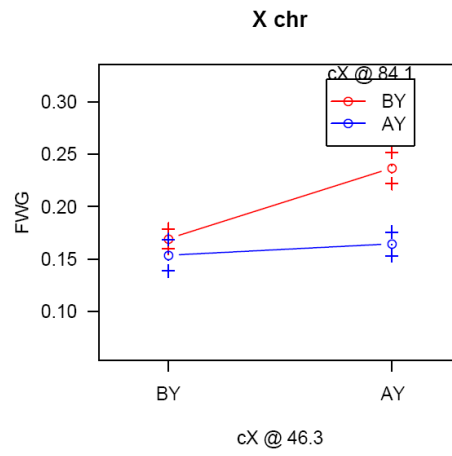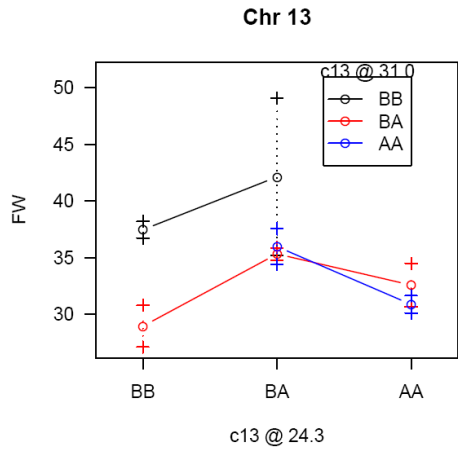

Supplementary Figure 3. B6 X A/J Intercross. The LOD curves for each trait (IW, FW, BMI, WG) in the B6 X A/J intercross is provided.

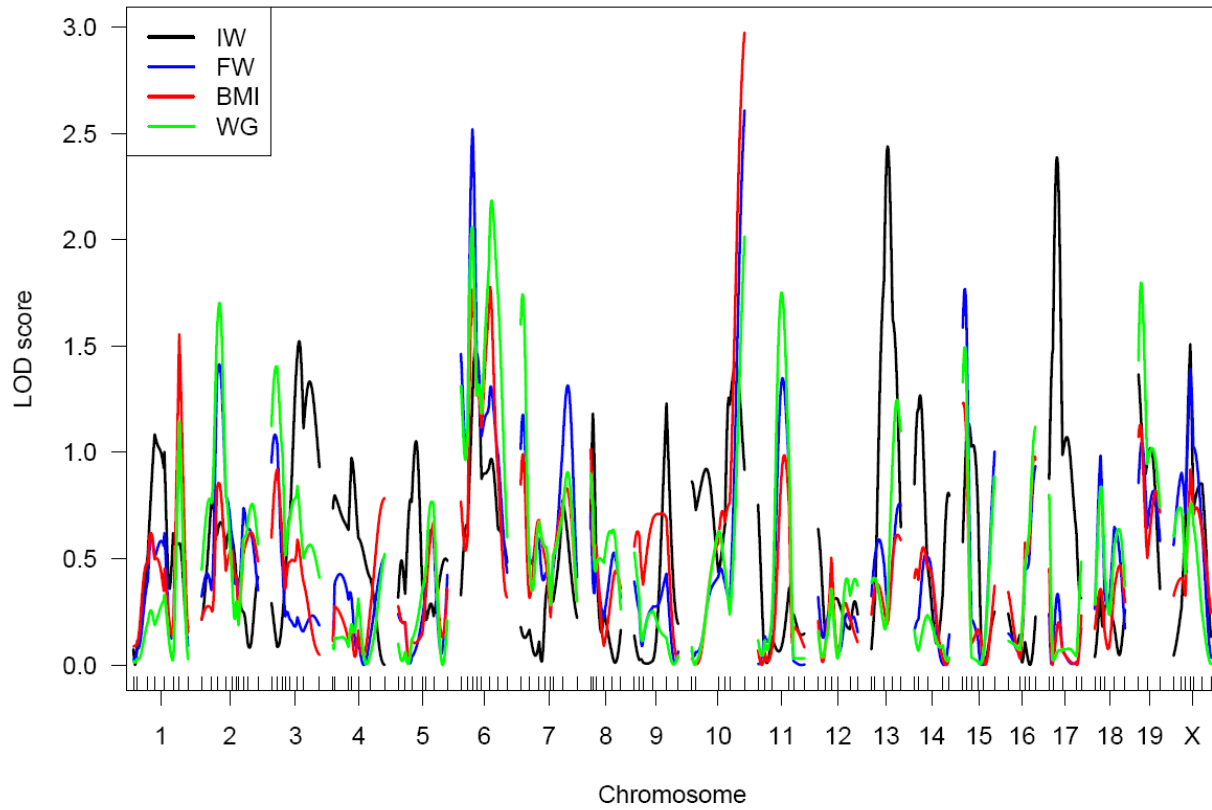

Supplement: NIHMS414172-supplement-Supplementary_data_figures.pdf [file NIHMS414172-supplement-Supplementary_data_figures.pdf]
